# Supplementary material
Source: publisher site journal article supplement (https://www.dovepress.com/article/446525)

**Supplementary Table S1 Clinical parameters of enrolled subjects**

| Clinical parameters                                          | Kidney transplant donor (n = 12) | Kidney transplant recipient (n = 12) | Healthy Controls (n = 10) |
|--------------------------------------------------------------|----------------------------------|--------------------------------------|---------------------------|
| HLA-A2 typing                                                | Positive                         | Negative                             | NA                        |
| Sex (male/female; number)                                    | 5/7                              | 7/5                                  | 3/7                       |
| Age (Median, [Q1 – Q3]; year)                                | 52.0 [40 – 58]                   | 61.0 [49.5 – 69.3]                   | 39.0 [27.5 – 47.0]        |
| Urine pH (Median, [Q1 – Q3])                                 | 5.5 [5.0 – 6.0]                  | 5.8 [5.5 – 7]                        | 5.5 [5.0 – 6.0]           |
| Urinary total protein concentration (Median, [Q1 – Q3]; g/L) | 0.04 [0.02 – 0.07]               | 0.38 [0.05 – 0.64]                   | 0.05 [0.04 – 0.06]        |
| Urinary creatinine concentration (Median, [Q1 – Q3]; mmol/L) | 3.4 [2.2 – 11.3]                 | 4.9 [3.0 – 6.9]                      | 14.0 [7.4 – 15.8]         |

**Supplementary Table S2 Antibody usage and EV staining protocol for IFCM**

| Target EV population | Sample                                   | Antibody             | Manufacturer                                 | Clone     | In-stock concentration (µg/mL) | Antibody dilution |
|----------------------|------------------------------------------|----------------------|----------------------------------------------|-----------|--------------------------------|-------------------|
| AQP2+ EVs            | Unprocessed urine                        | CD63-APC             | Biolegend ( San Diego, CA, USA)              | H5C6      | 200                            | 1:30              |
|                      |                                          | AQP2-Alexa488        | Santa Cruz (Dallas, TX, USA)                 | E-2       | 200                            | 1:15              |
| HLA-A2+ EVs          | Unprocessed urine                        | CD9-Alexa488         | Bio-Connect (Huissen, the Netherlands)       | HI9a      | 100                            | 1:15              |
|                      |                                          | CD63-Alexa488        | Biolegend                                    | H5C6      | 200                            | 1:30              |
|                      |                                          | HLA-A2-VioBlue       | Miltenyi Biotec (Bergisch Gladbach, Germany) | REA517    | 750                            | 1:20              |
| HLA class I+ EVs     | Unprocessed urine                        | CD9-APC              | Bio-Connect                                  | HI9a      | 100                            | 1:15              |
|                      | 100-fold-diluted uEV isolate             | HLA class I-Alexa488 | Bio-Techne (Minneapolis, MN, USA)            | TP25.99SF | 730                            | 1:100             |
|                      | Cell supernatant (Raji, Jurkat, or HK-2) |                      |                                              |           |                                |                   |
|                      | 12.7-fold-diluted platelet-poor plasma   |                      |                                              |           |                                |                   |

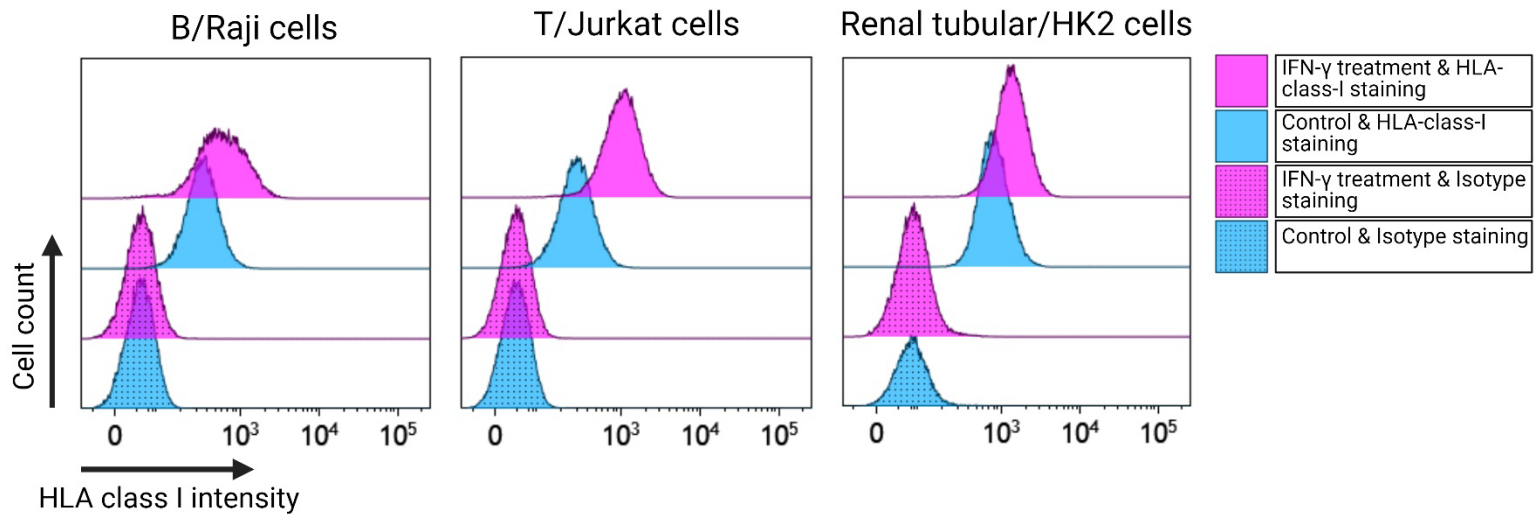

**Supplementary Figure S1** HLA class I expression on Raji, Jurkat, and HK-2 cell lines after IFN- $\gamma$  treatment. 2 million cells were used for staining with 0.5  $\mu$ L of HLA class I-Alexa488 or 1.8  $\mu$ L of IgG1-Alexa488 at room temperature for 30 min. Cells were acquired using a BD FACSCanto II flow cytometry system (BD Biosciences). After selecting single cells, the final readout histograms are presented here. The purple peaks denote IFN- $\gamma$ -treated cells stained by HLA class I-Alexa488 (plane pattern) or isotype (dot pattern). The blue peaks show untreated cells stained by HLA class I-Alexa488 (plane pattern) or isotype (dot pattern).

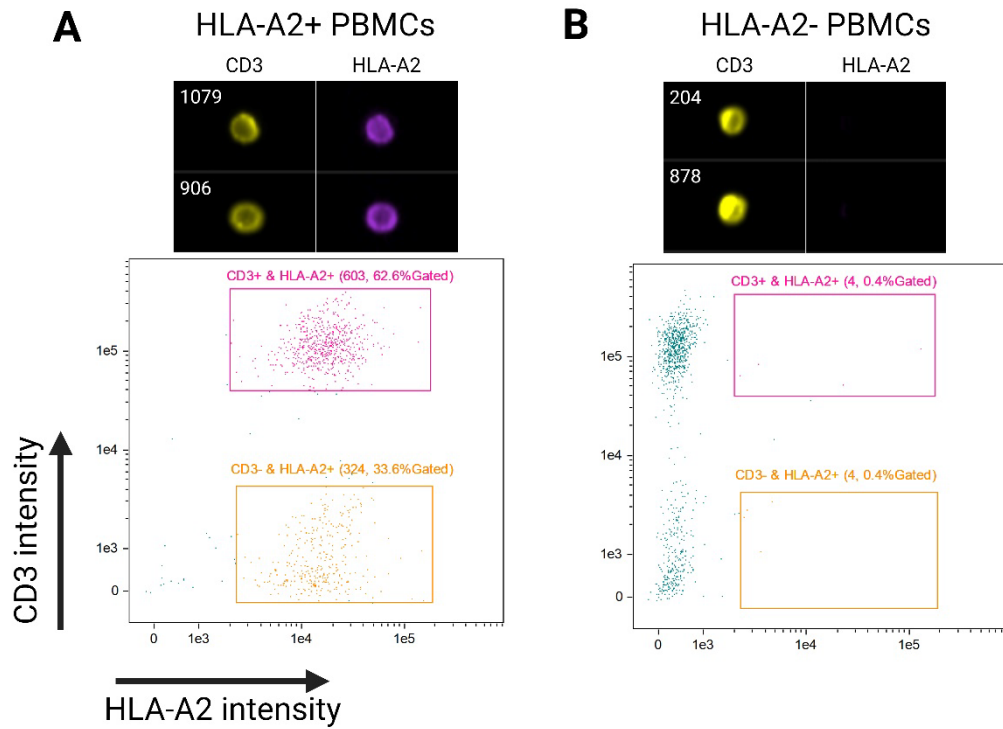

**Supplementary Figure S2** Verification of the HLA-A2-VioBlue antibody specificity using IFCM. One million HLA-A2+ (**A**) or HLA-A2- PBMCs (**B**) were labeled with 0.5  $\mu$ L of CD3-BV510 and 1  $\mu$ L of HLA-A2-VioBlue at room temperature for 30 min. CD3 and HLA-A2 double-positive cells are gated in the pink gates, and CD3-negative and HLA-A2+ cells are included in the yellow gates. Each gate's name shows the count and percentage of gated cells. **Abbreviation:** PBMCs, peripheral blood mononuclear cells.

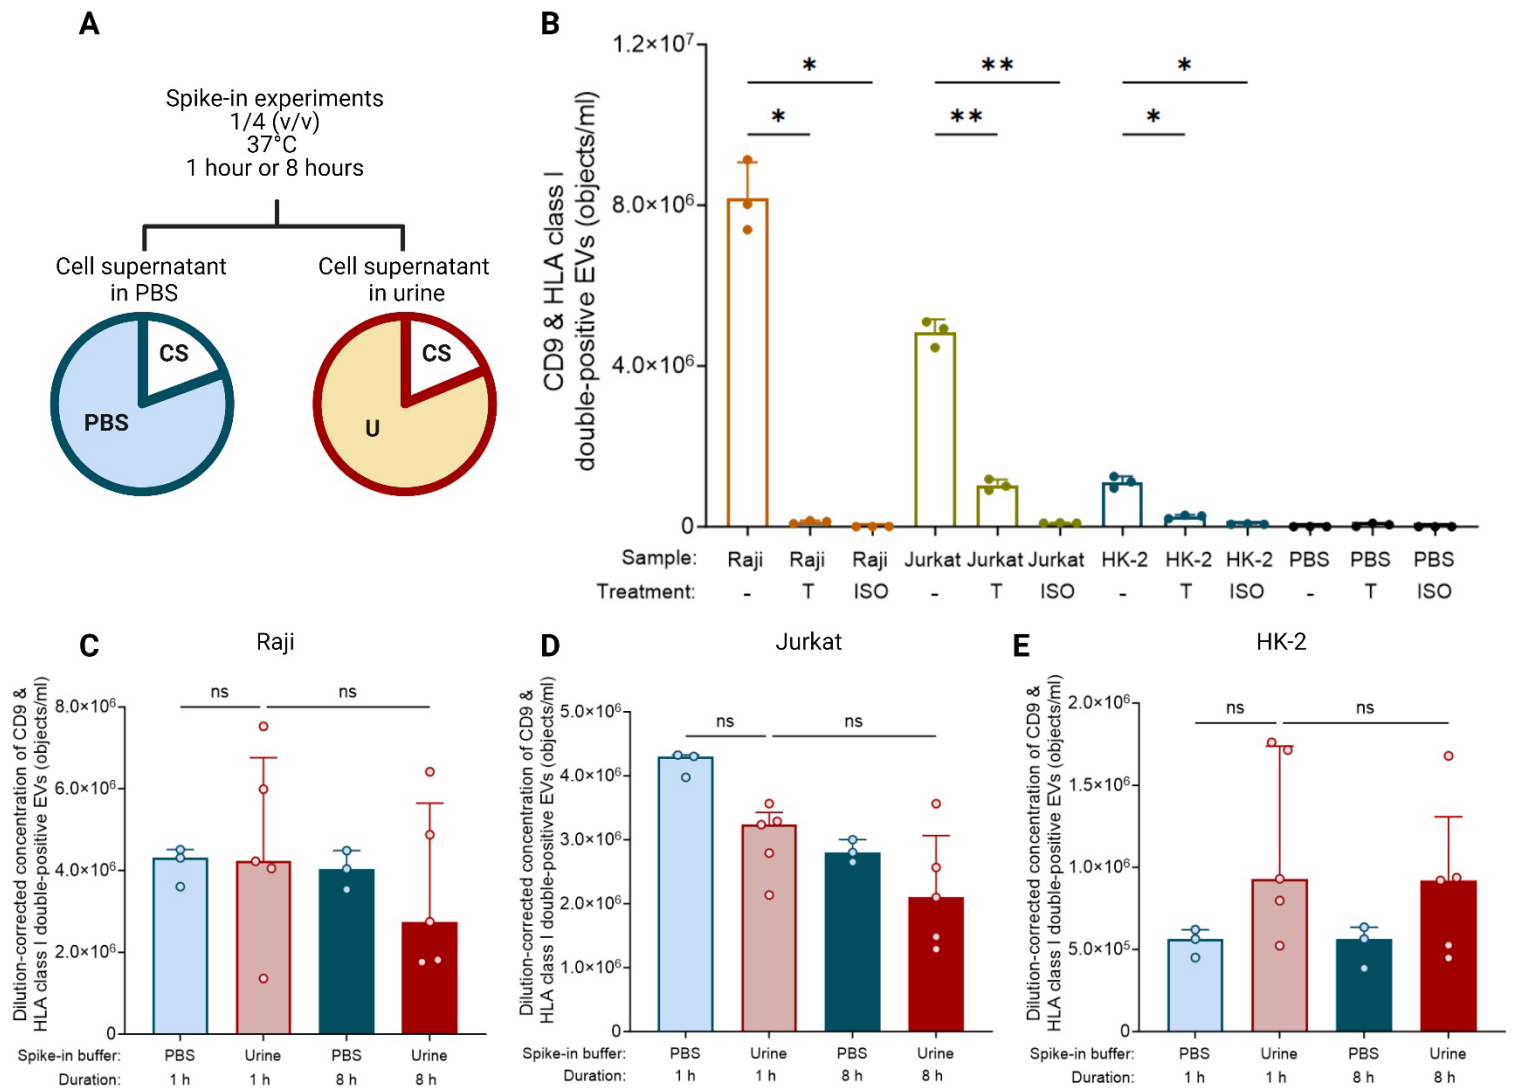

**Supplementary Figure S3** Urine matrix effects on the surface HLA class I of EVs from cell lines. **(A)** Schematic overview of diluting cell supernatant containing HLA class I+ EVs into PBS or urine with a volume ratio 1:4 at 37 °C for 1 h or 8 h. EVs are measured using IFCM. Each cell supernatant is spiked in PBS (repeated 3 times) or healthy urine samples (n = 5). After the incubation, all samples are stained by CD9-APC and HLA class I-Alexa488 and measured using IFCM. **(B)** The concentration of CD9 and HLA class I double-positive EVs in cell supernatant (Raji, Jurkat, and HK-2) measured by IFCM. Data were presented as mean ± SD. **(C – E)** Dilution-corrected concentrations of CD9 and HLA class I double-positive EVs in the spike-in experiments using supernatant from Raji **(C)**, Jurkat **(D)**, and HK-2 **(E)**. Data are presented as median [Q1 – Q3]. **Abbreviations:** ISO, isotype staining; T, TritonX-100 treatment. **Marks:** \*\*,  $p < 0.01$ ; \*,  $p < 0.05$ ; ns, no significant difference.

# Supplementary Figure S4

## Immunogold staining cryo-EM images

**A – C:** T cell-derived EVs (positive control)

**D – G:** uEV sample 1

**H – K:** uEV sample 2

Staining: anti-HLA class I antibody conjugated  
with 6-nm gold nanoparticles (NPs)

T-cell-derived EVs  
(positive control)

**A**

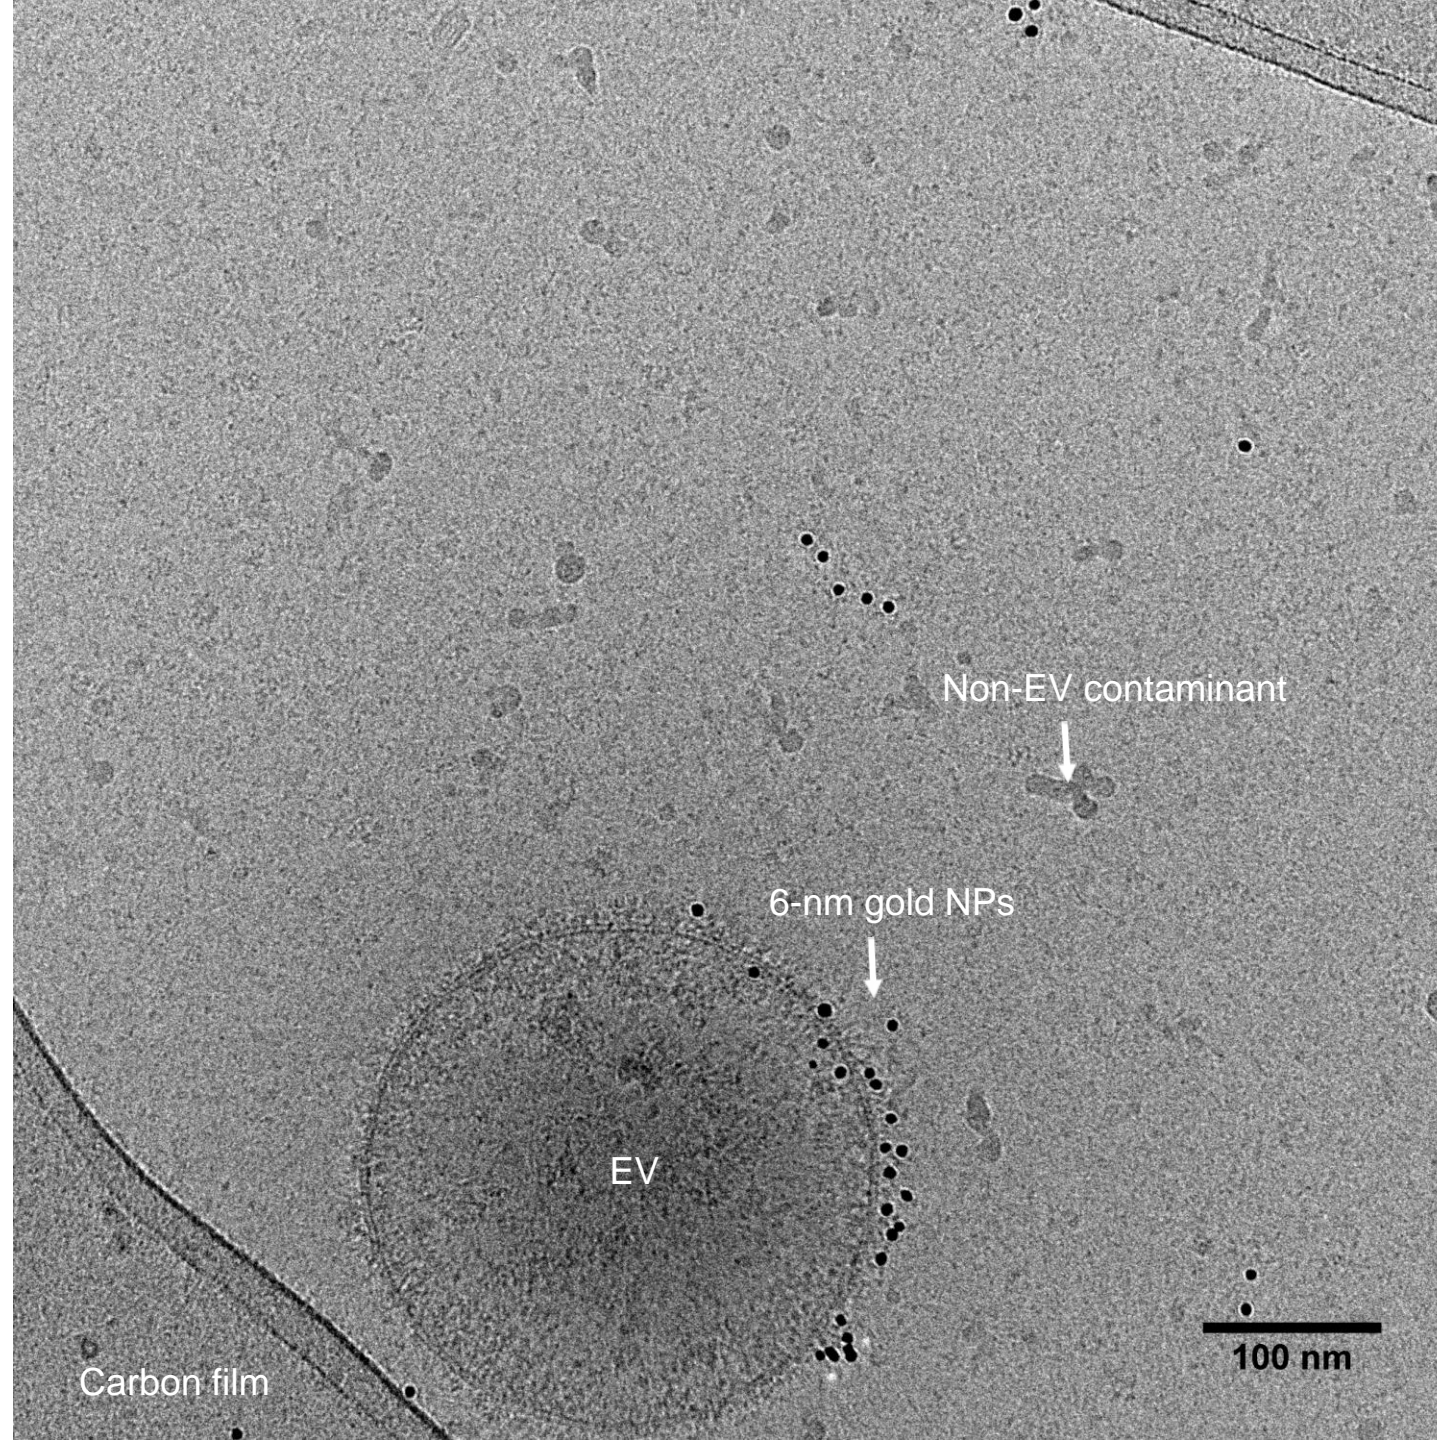

T-cell-derived EVs  
(positive control)

**B**

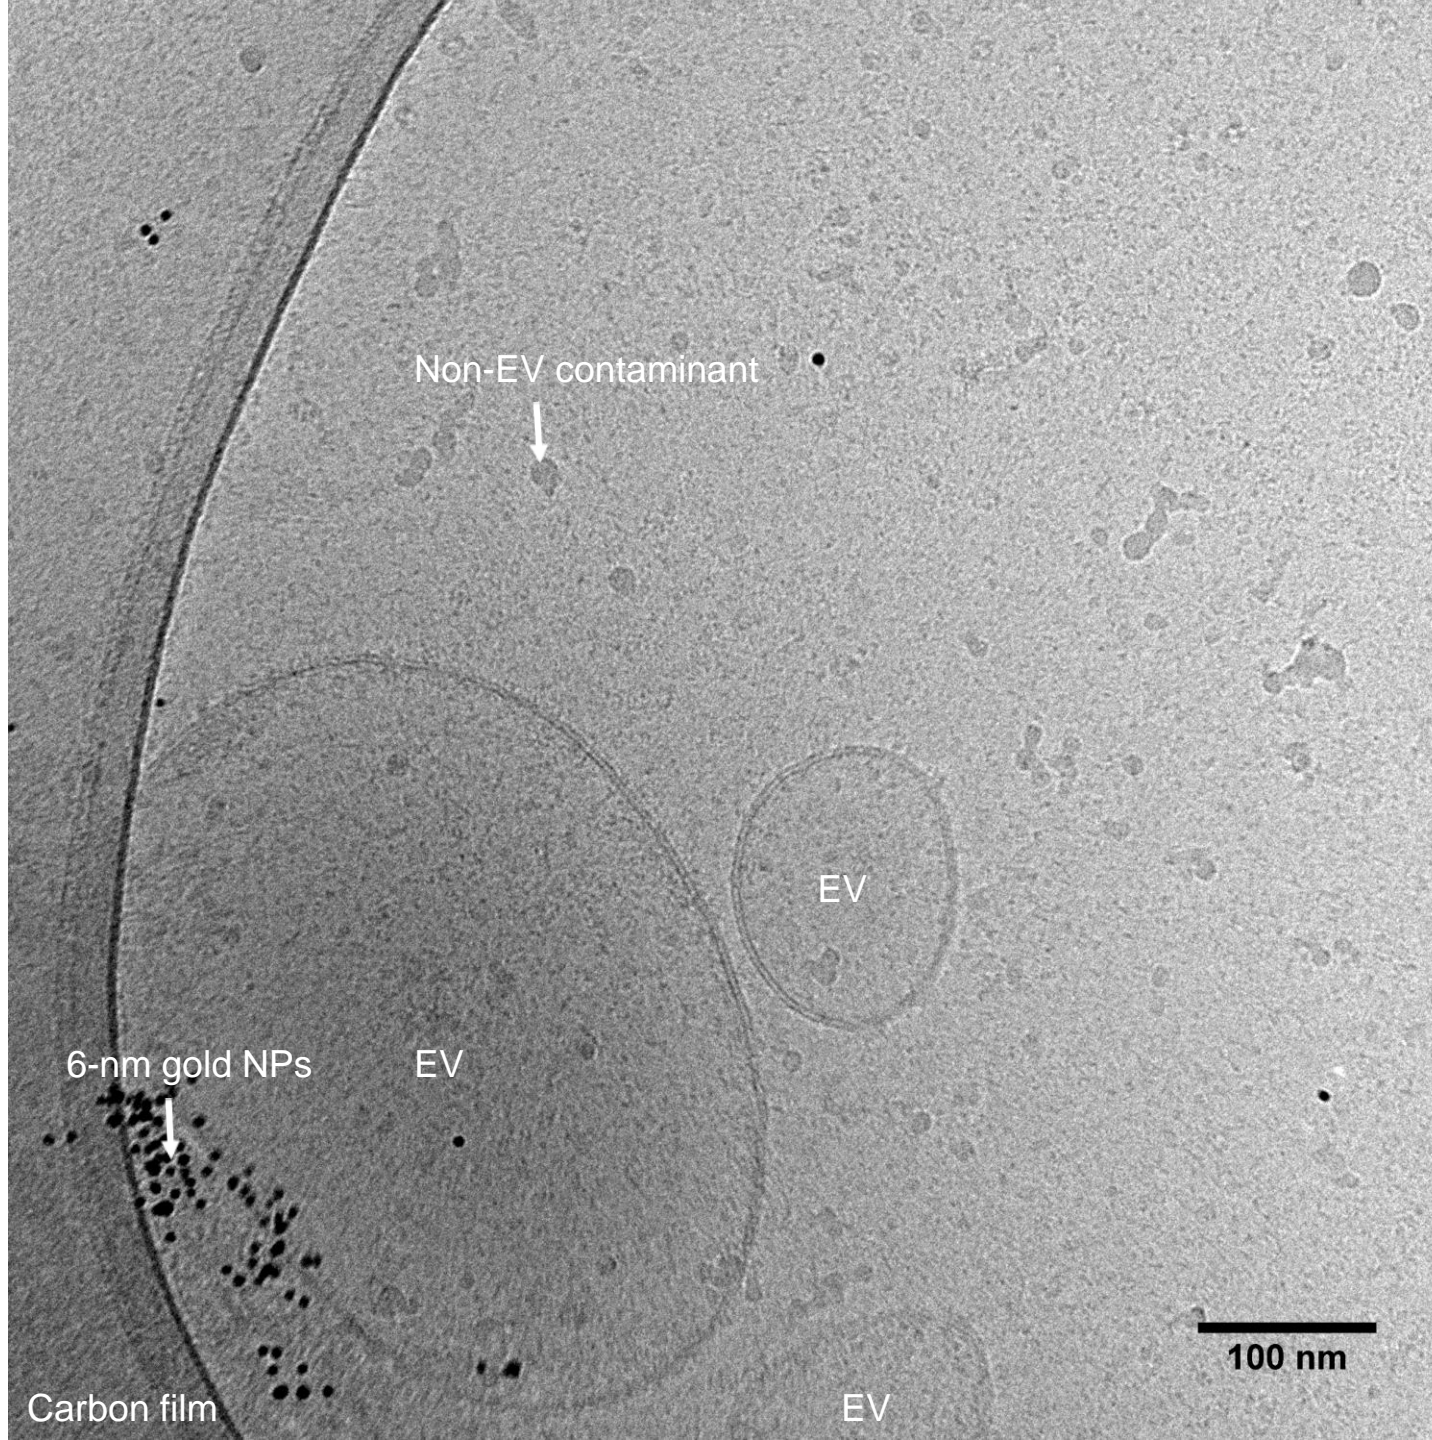



T-cell-derived EVs  
(positive control)

**C**

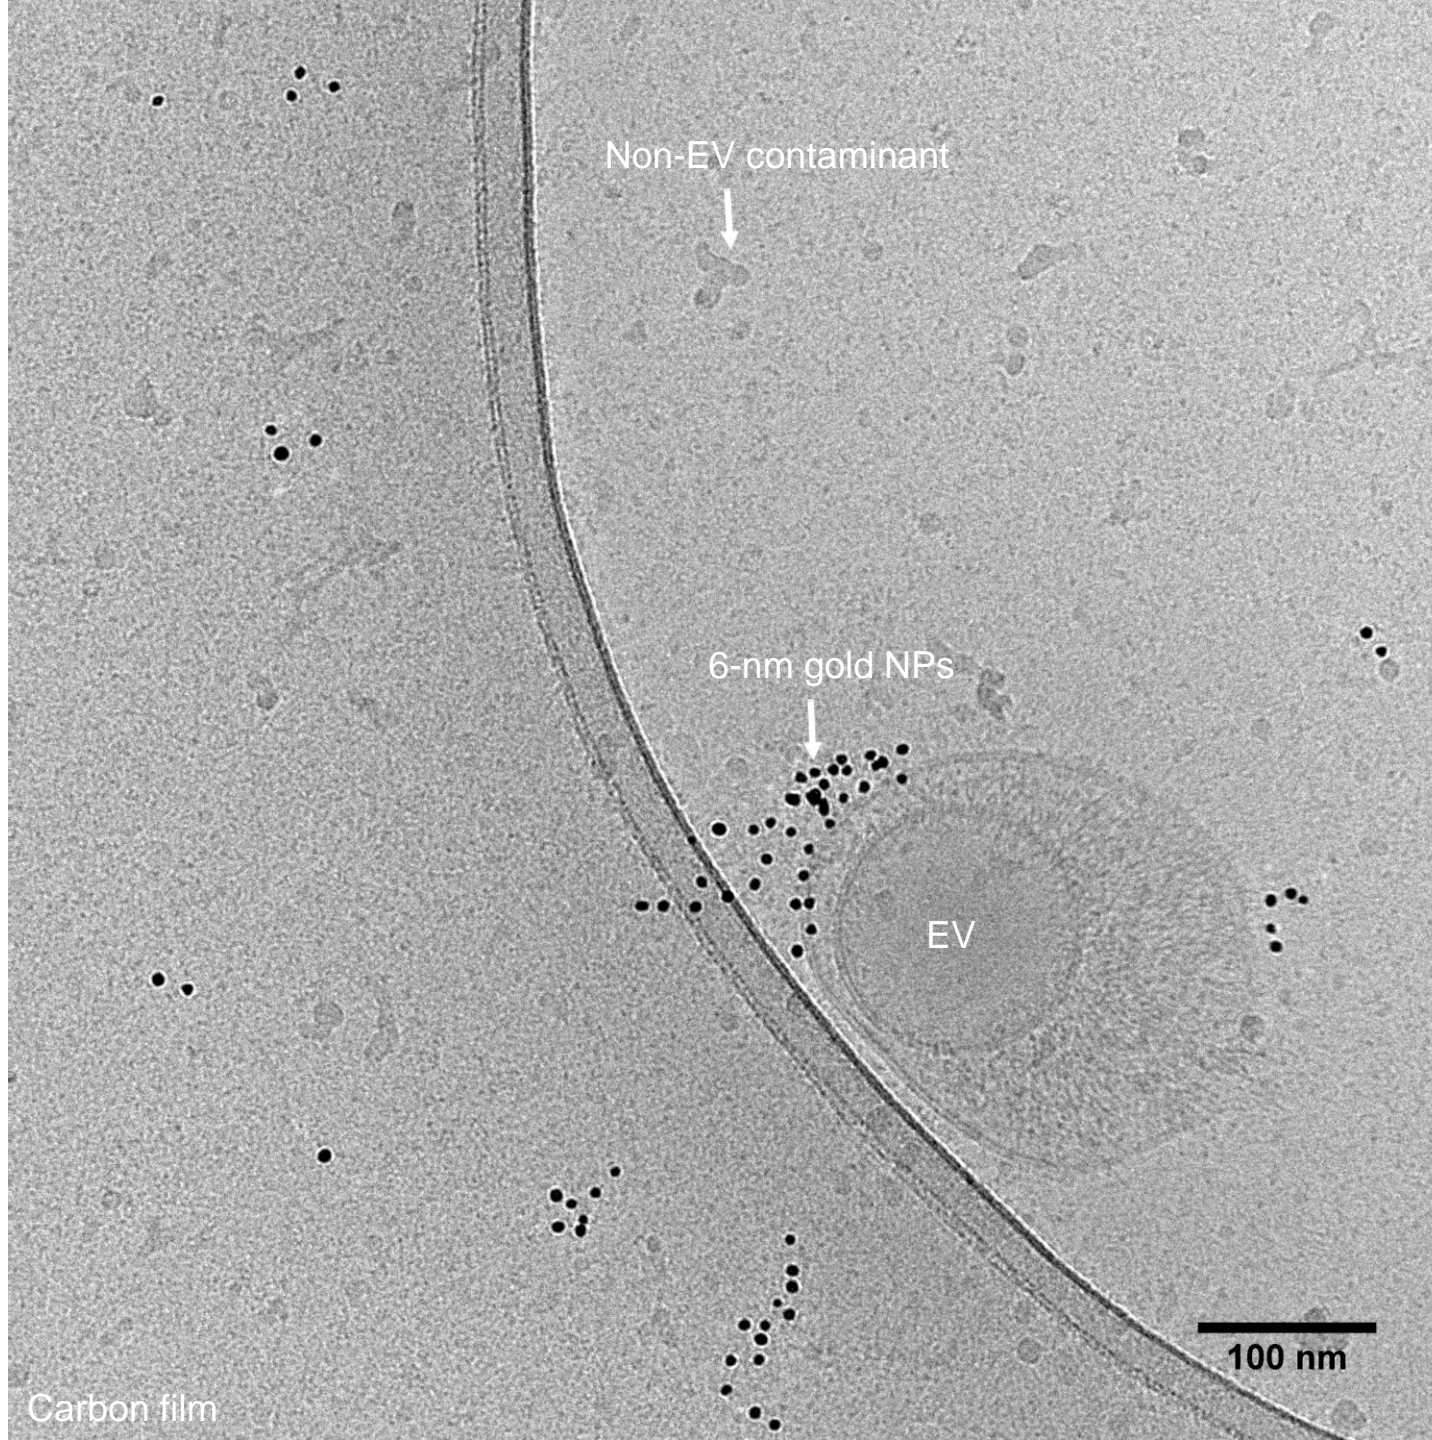

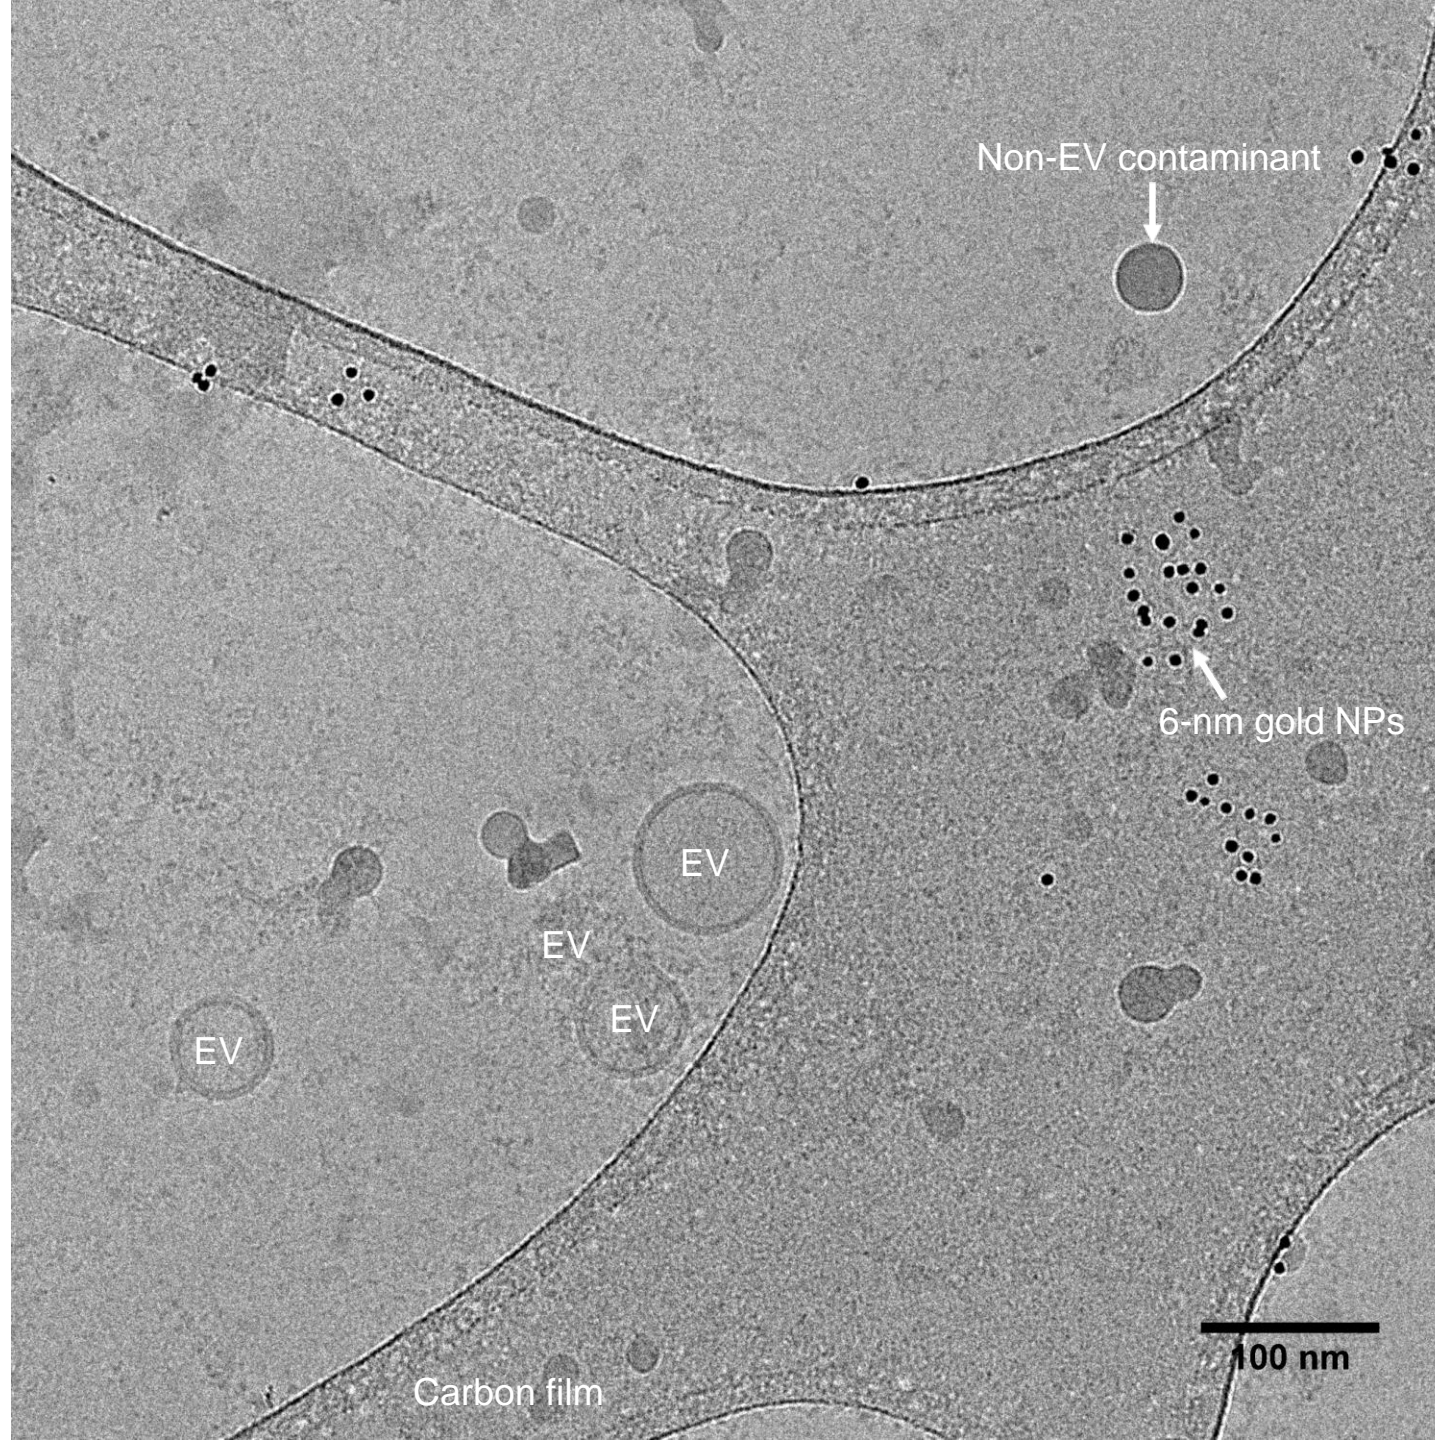

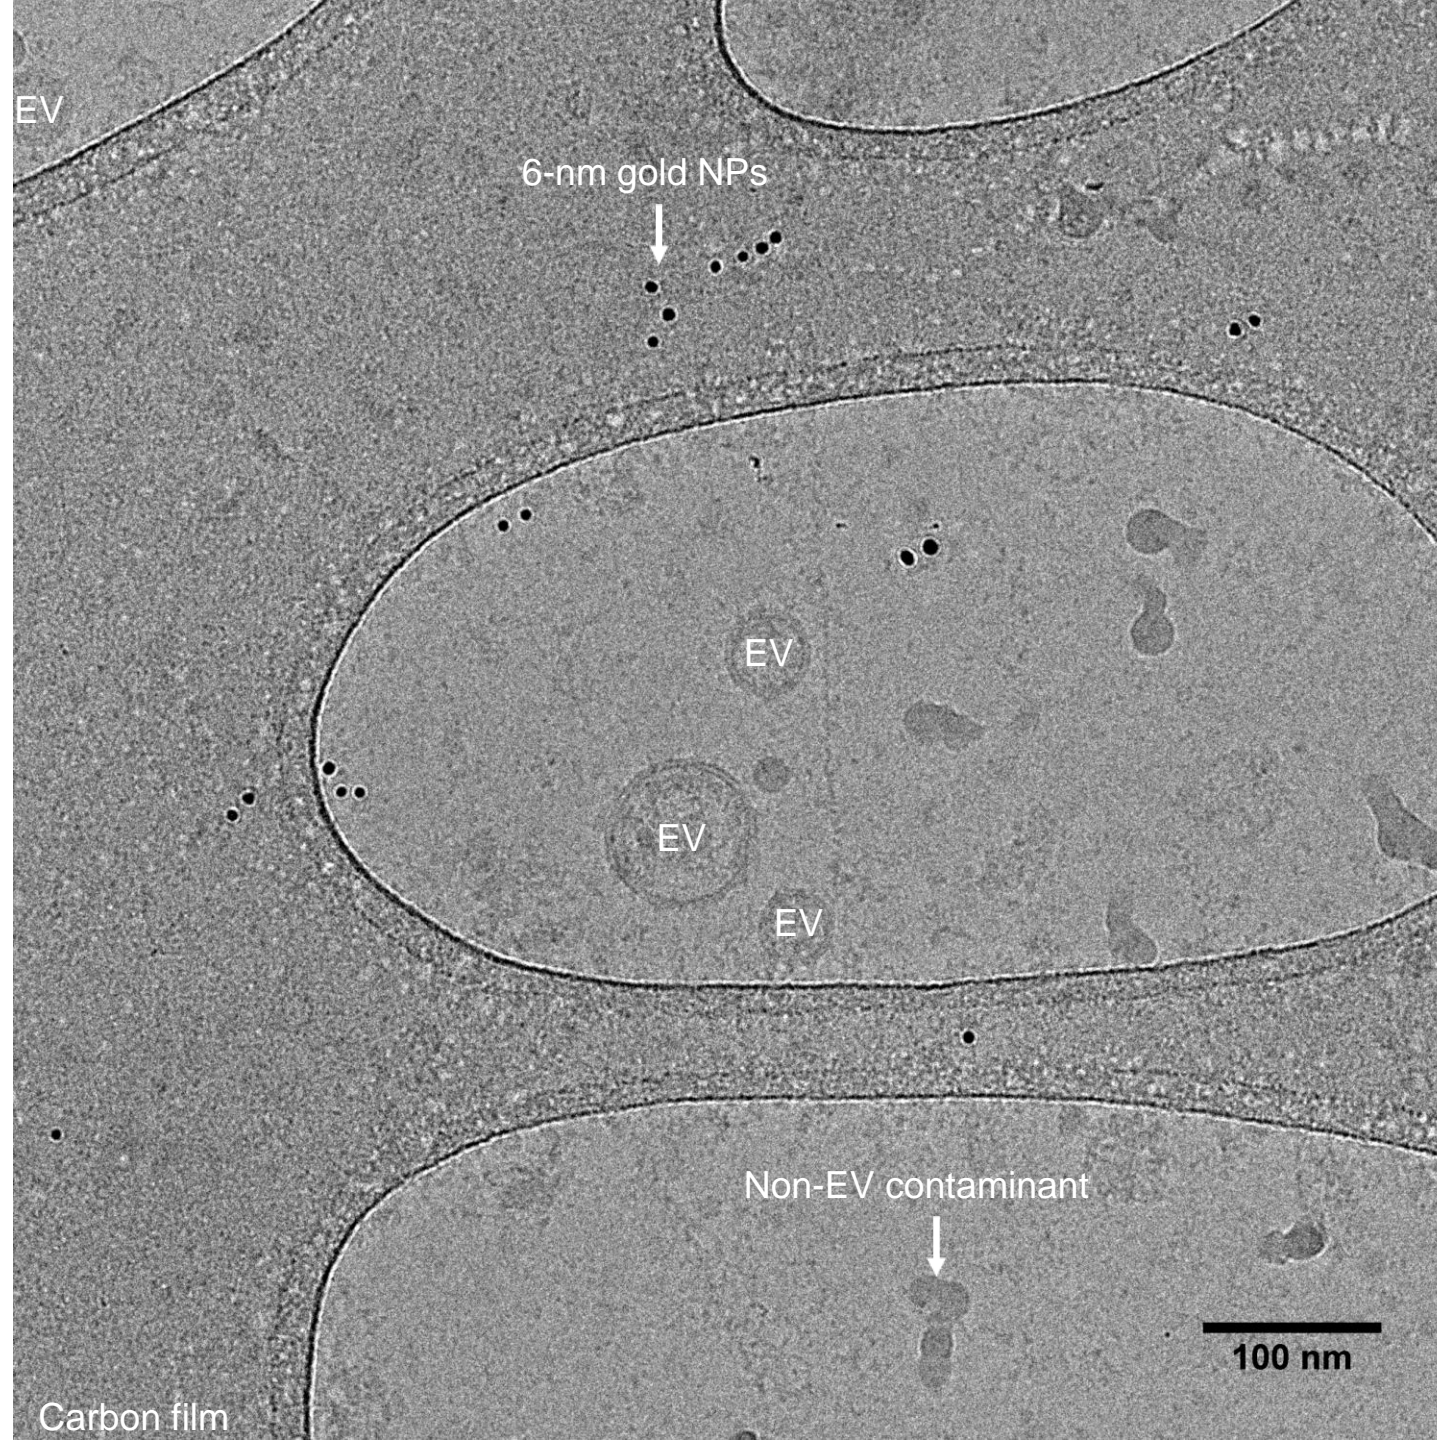

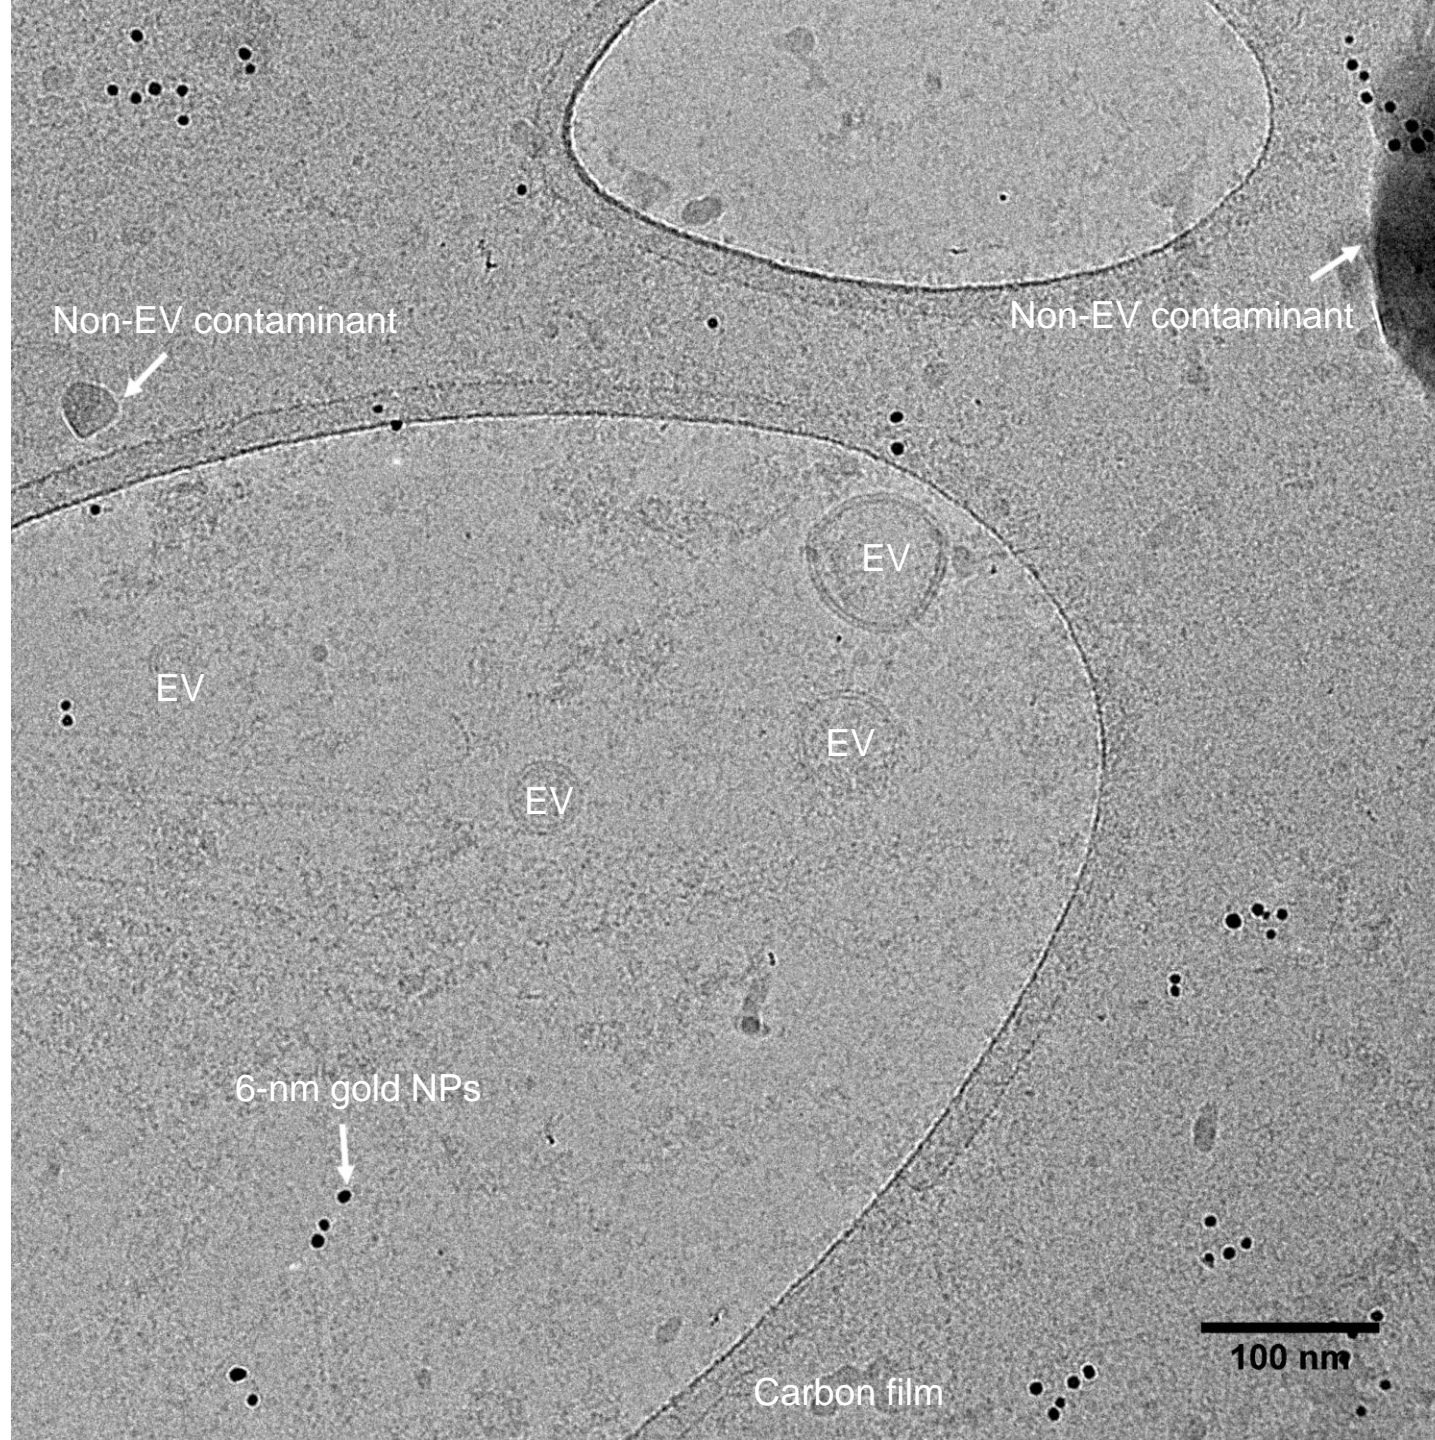

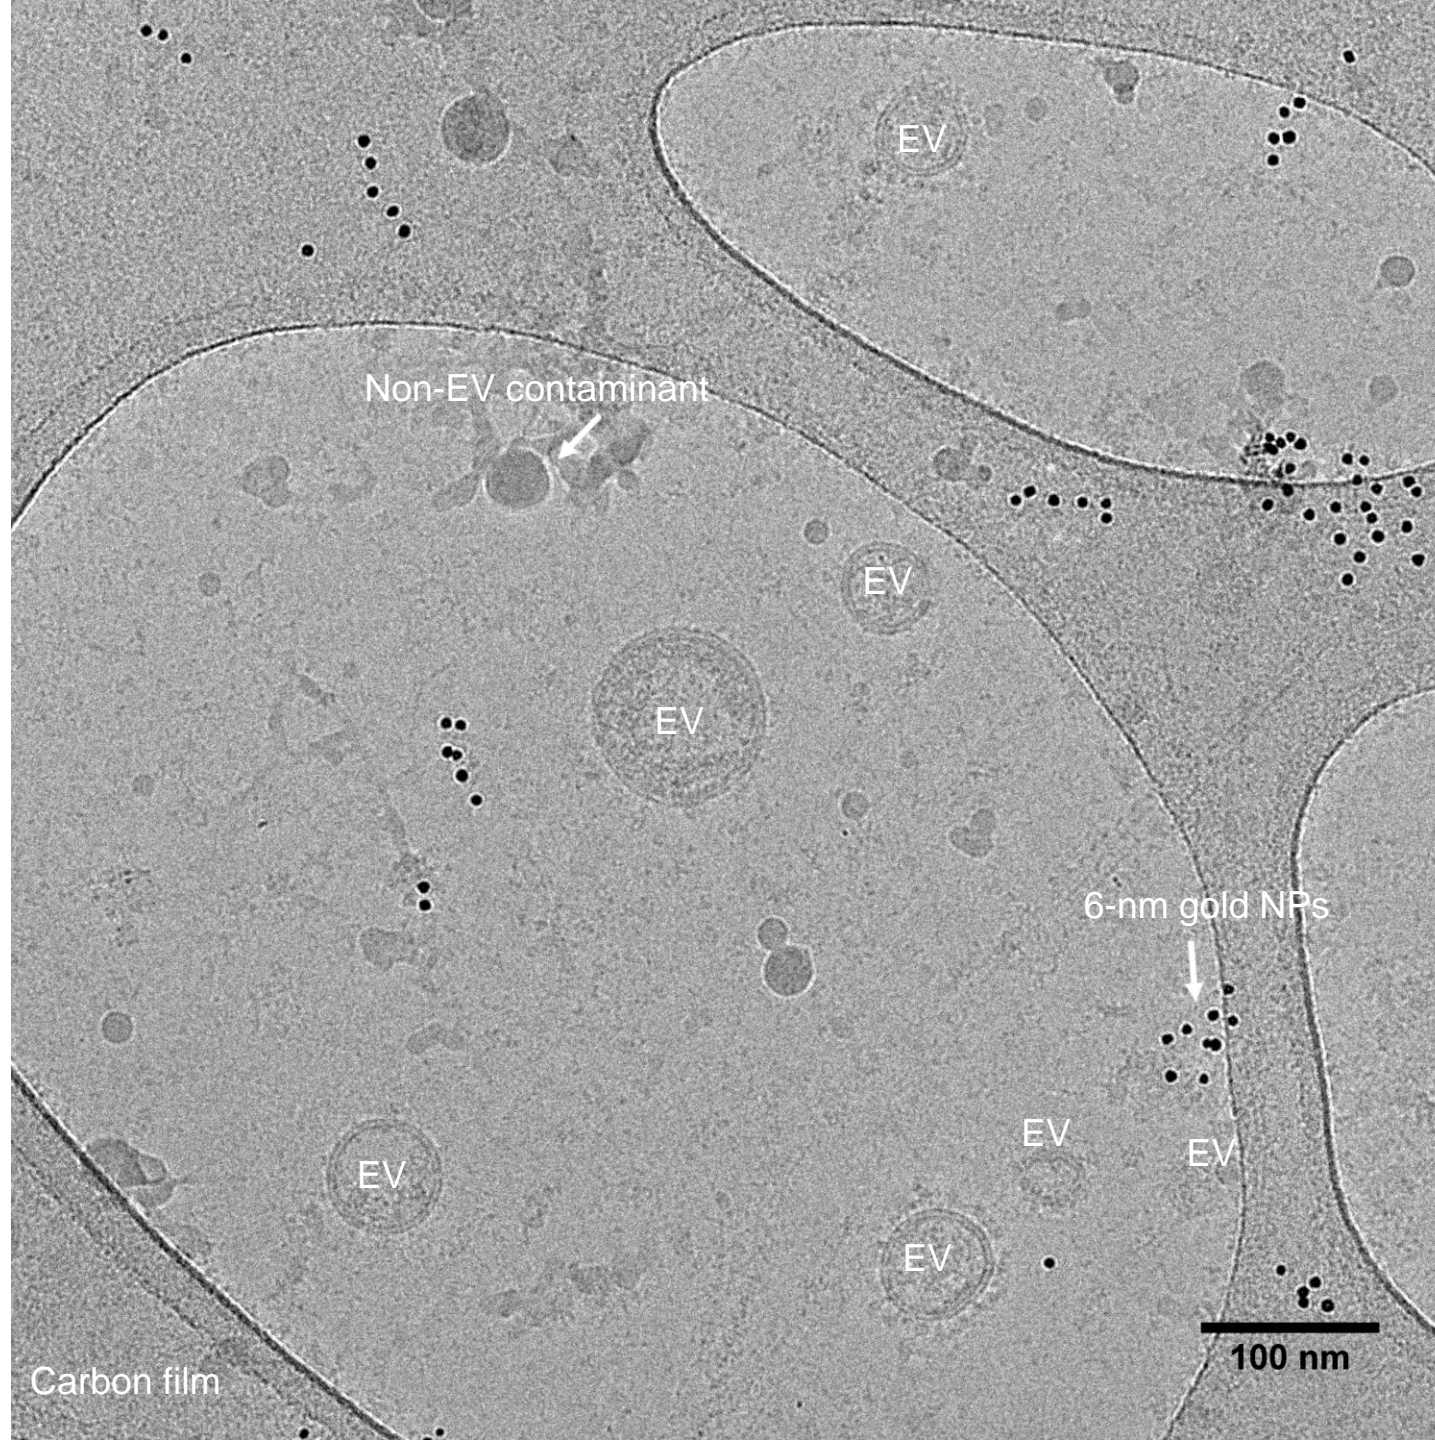

uEV sample 2

H

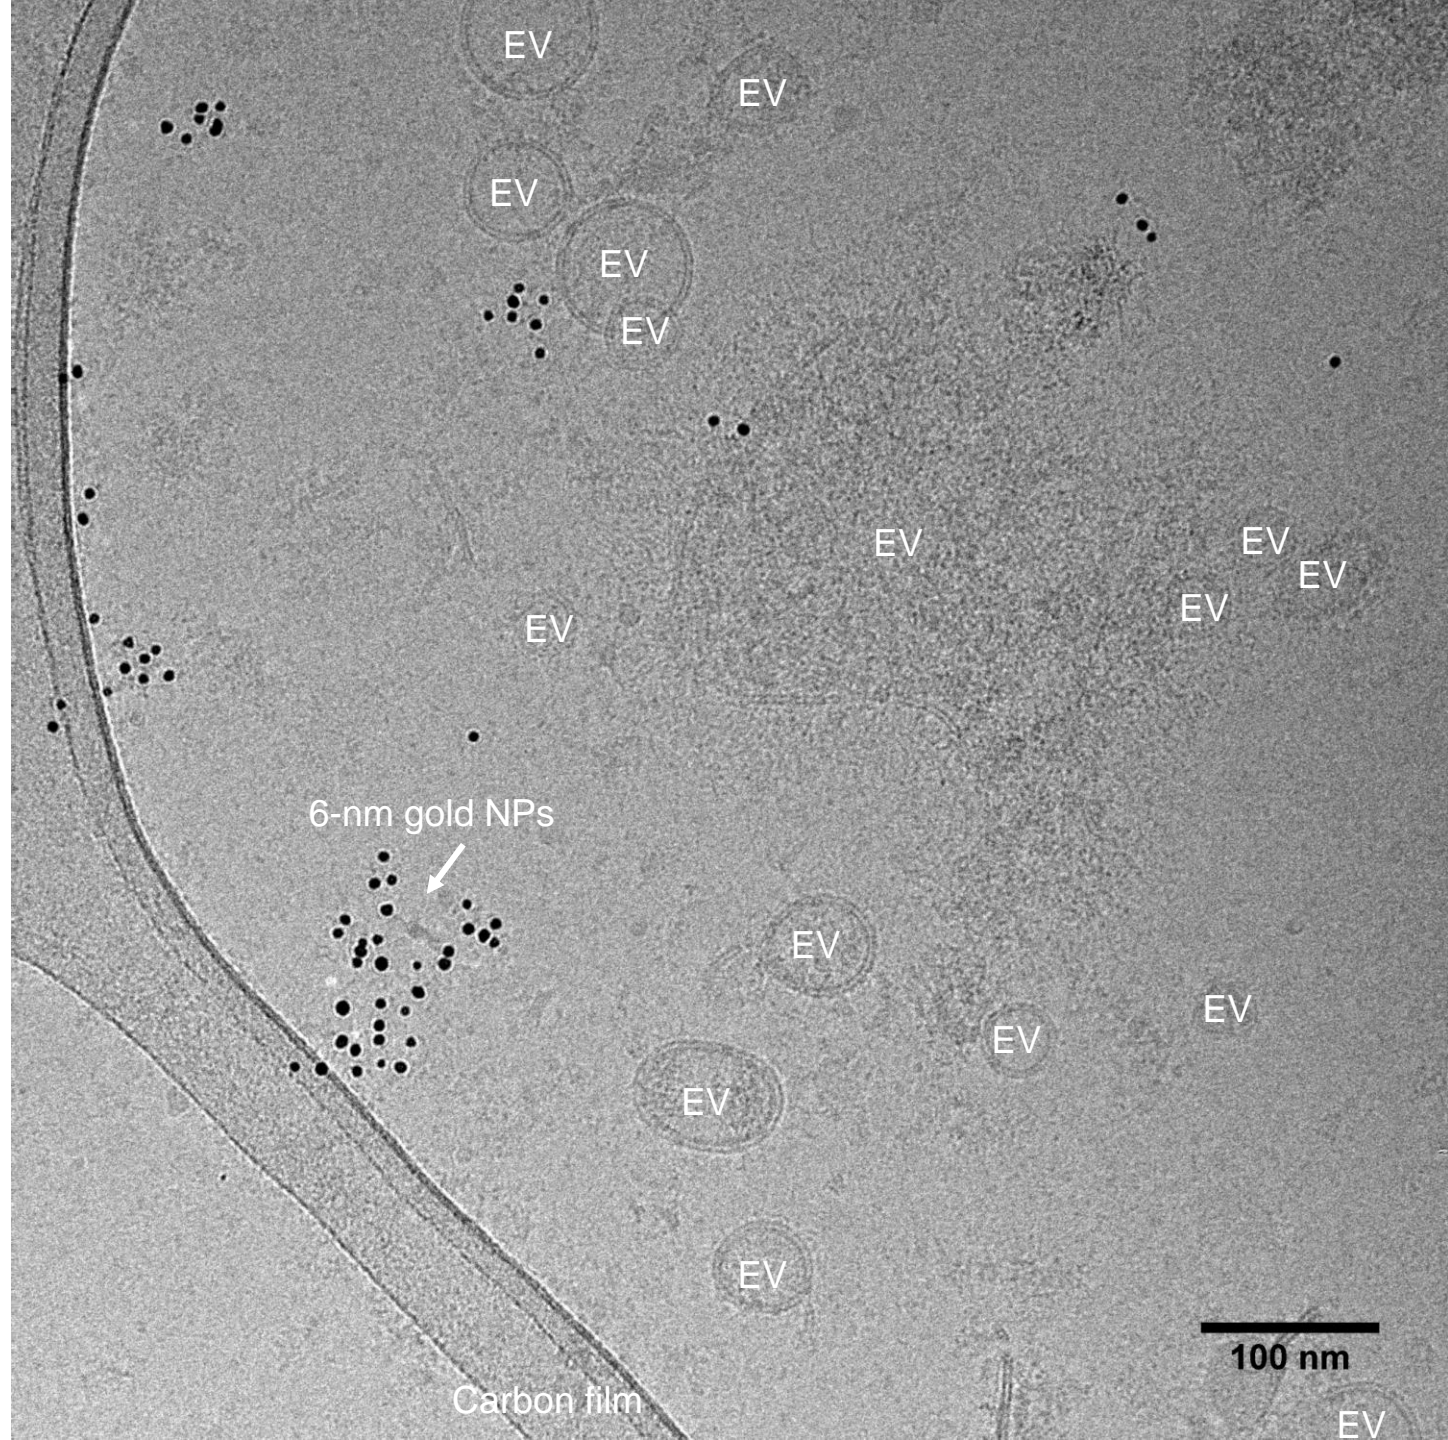

6-nm gold NPs

Carbon film

100 nm

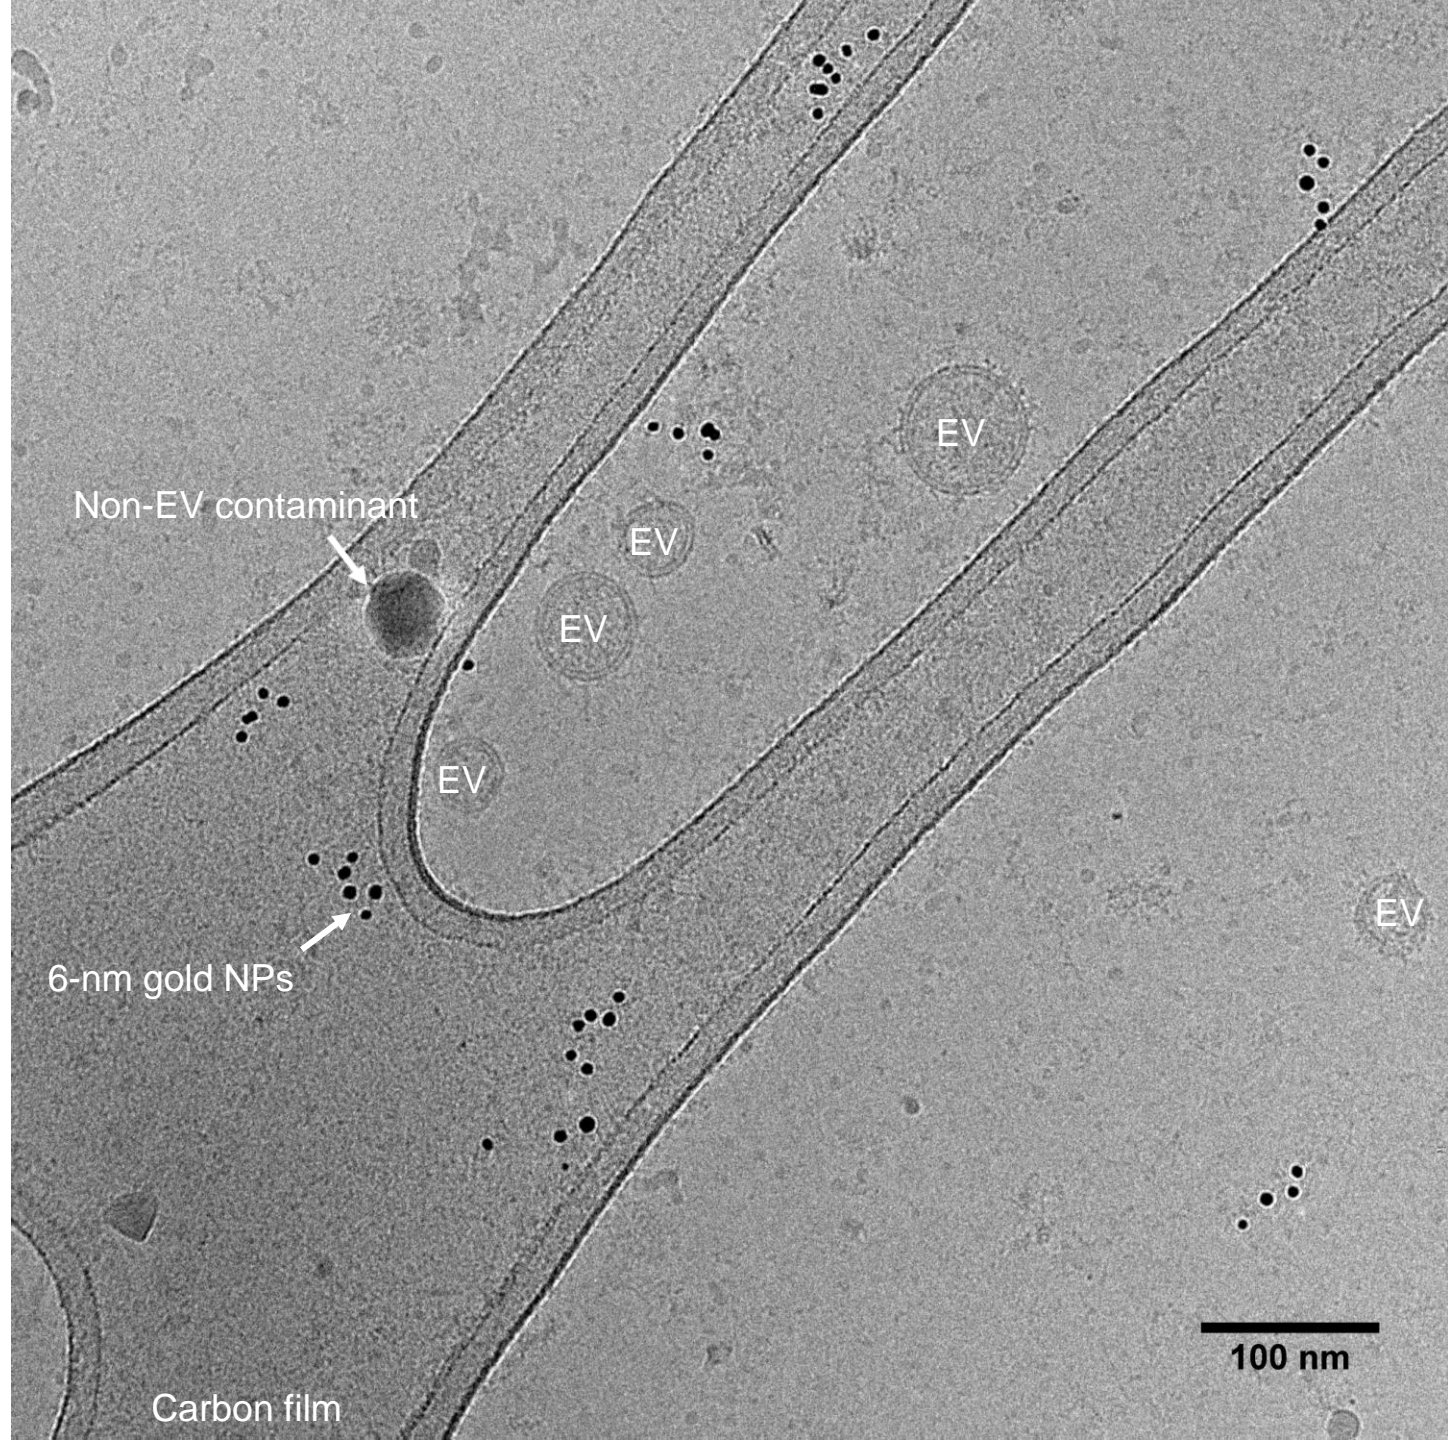

Non-EV contaminant

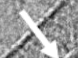

6-nm gold NPs

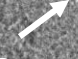

Carbon film

100 nm

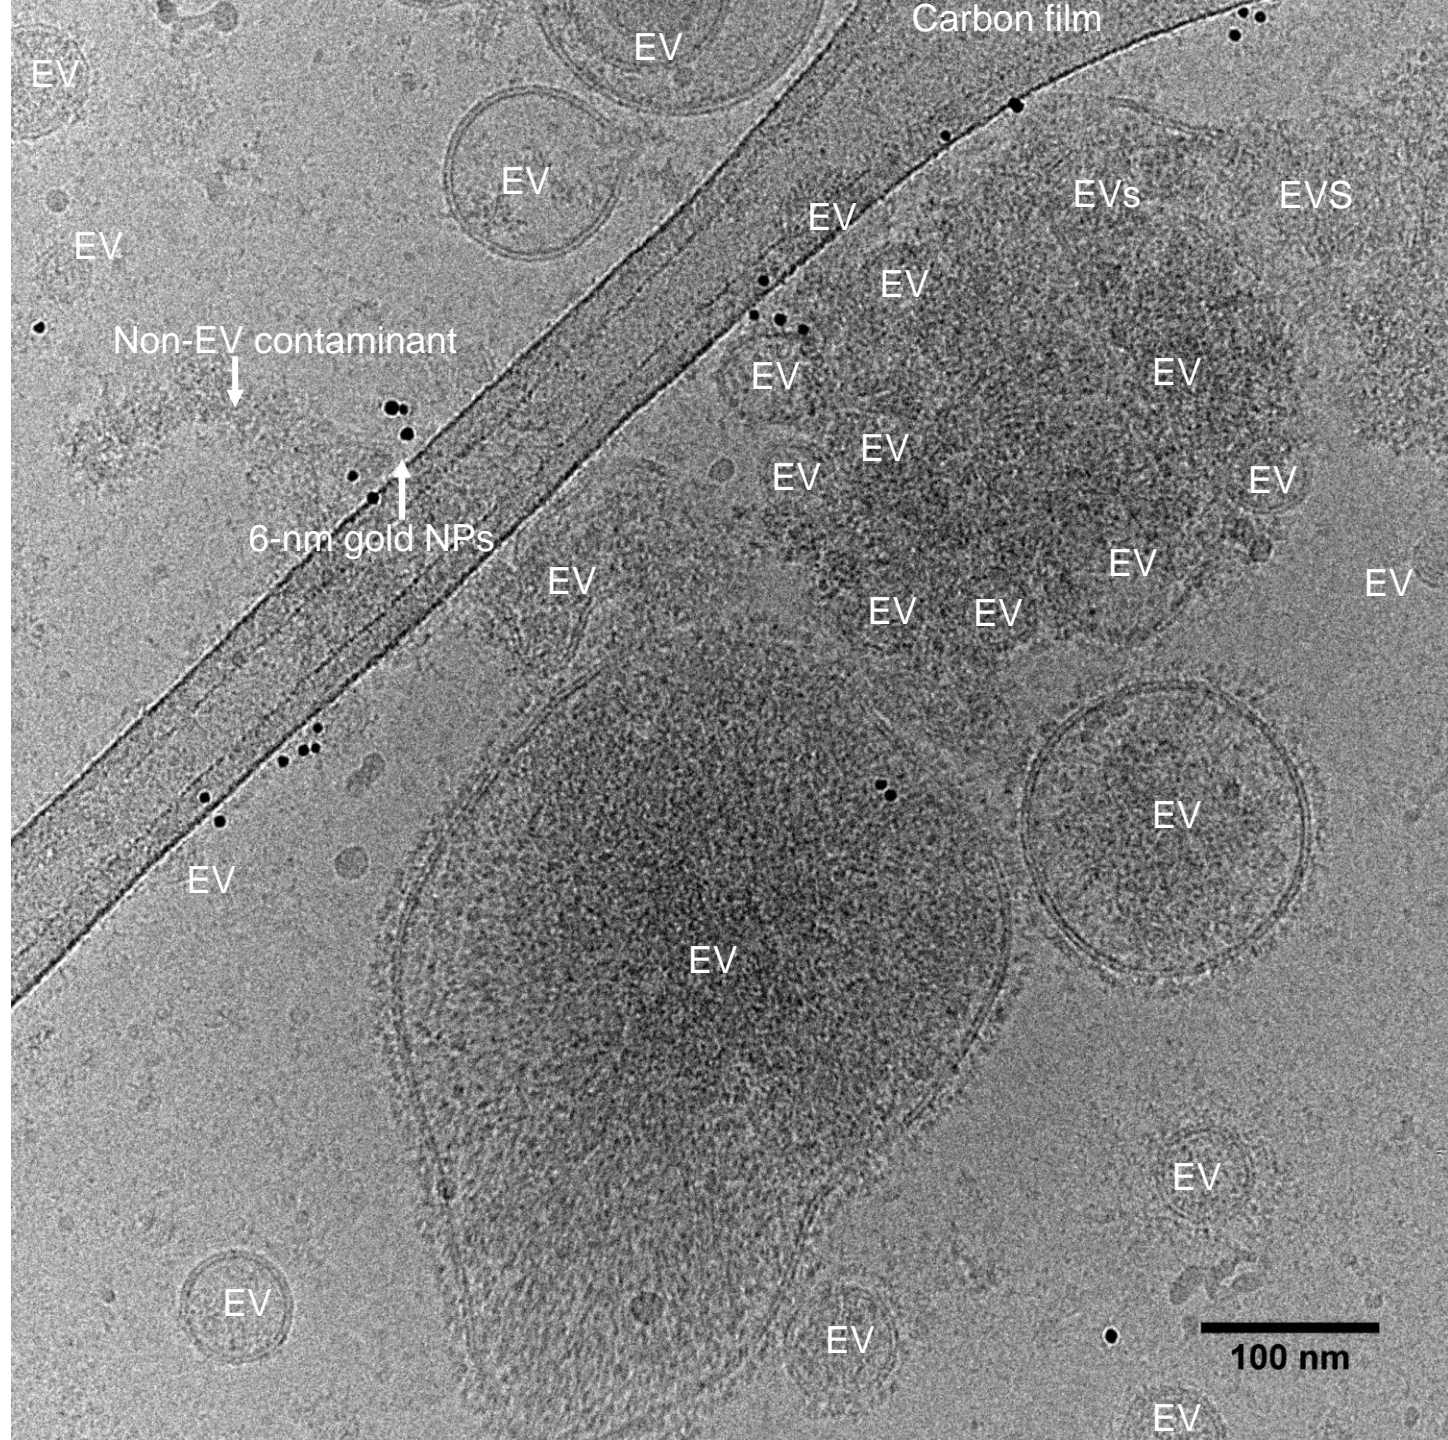



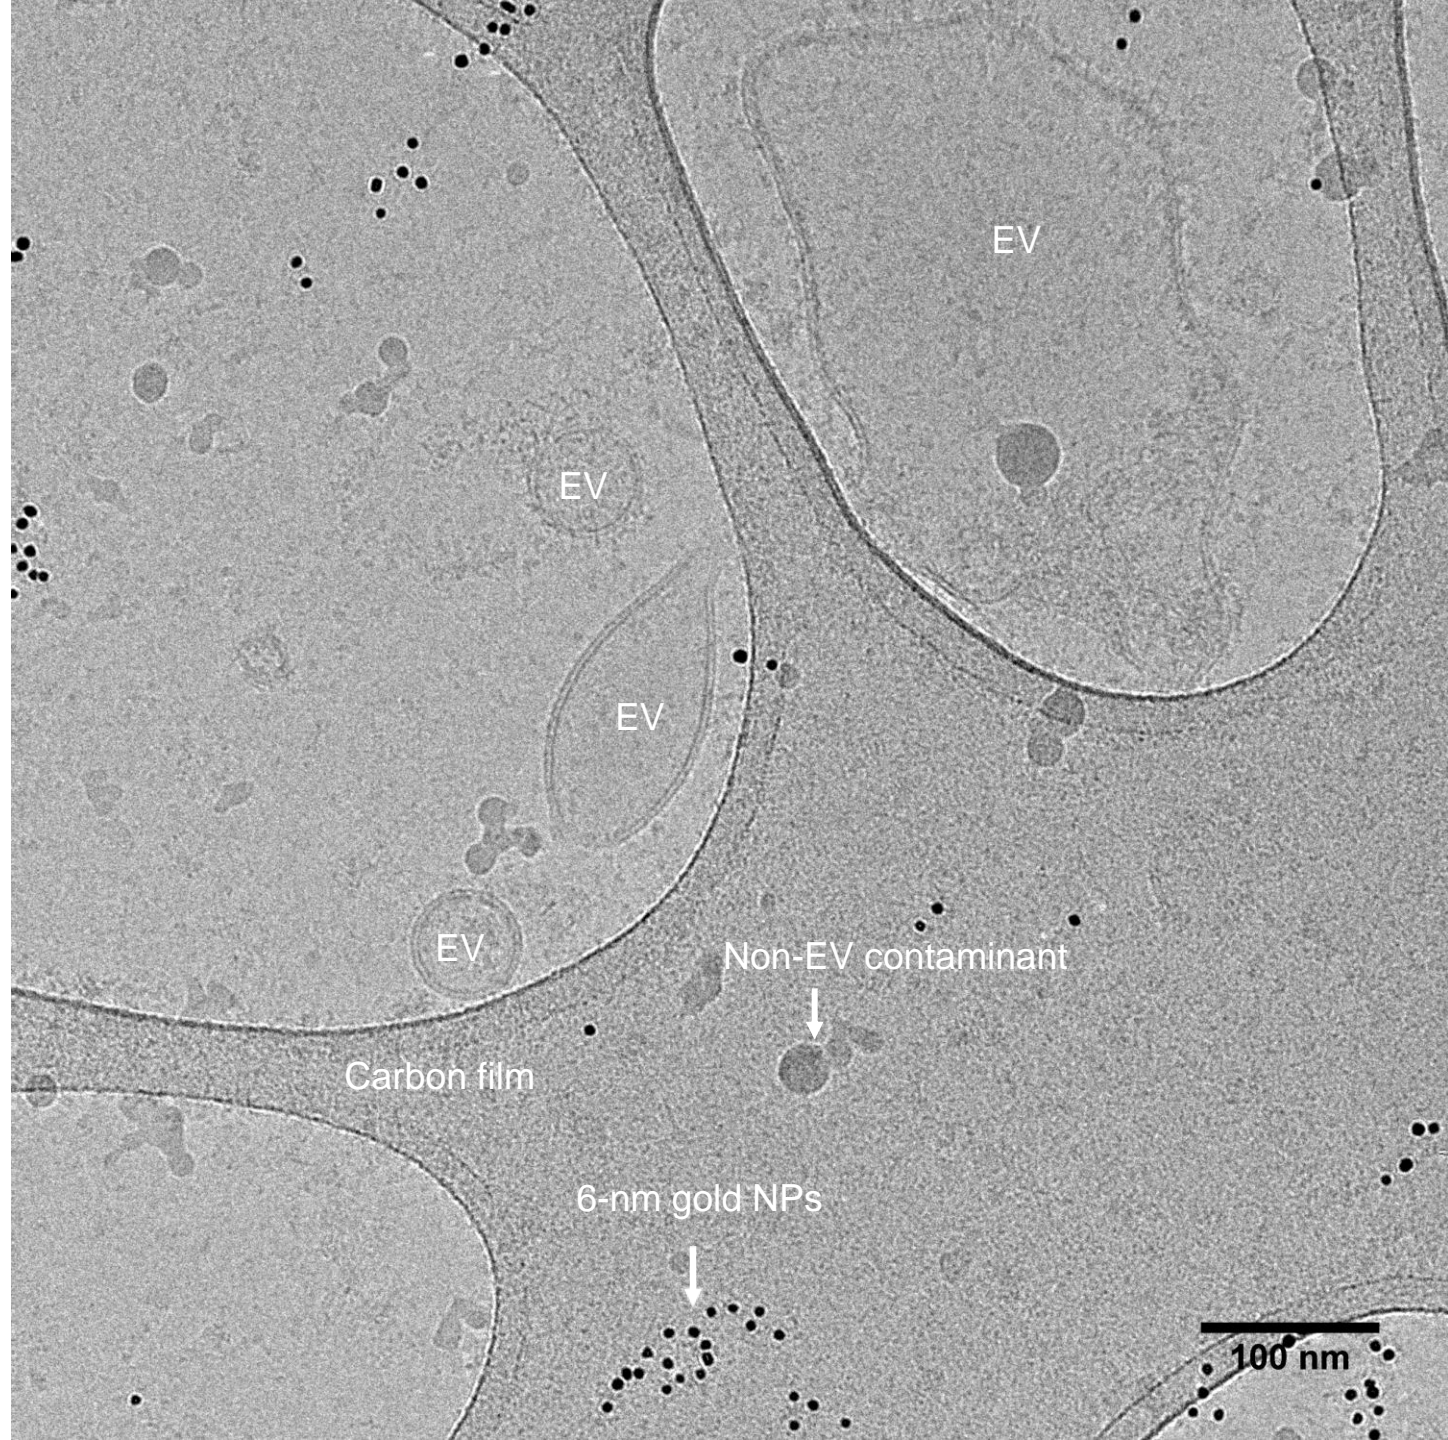

Supplement: Supplementary file 1 [file get_supplementary_file.php]
